# Supplementary material for: The Role of Predictions in Acquisition Decision Making: The Strategic Value of AI-Driven Foresight
Source: Atypon-hosted journal article supplement (doi:10.1287/stsc.2025.0418), 2026-02-09
Supplement: stsc.2025.0418.sm1.pdf [file stsc.2025.0418.sm1.pdf]

## ONLINE APPENDICES

### Appendix A. ML Input Variables

We use an exhaustive list of 286 input variables in our ML models to predict market reactions. The variables are selected based on prior literature with potential impact on the market's assessment of a transaction and its value creation. The variables fall under five categories: 1) deal attributes (Refinitiv database), 2) characteristics and accounting performance of the acquirer and target (Compustat database), 3) prior acquisition activities and performance of the acquirer (Refinitiv & CRSP databases), 4) activeness and performance of recent acquisitions in the market (Refinitiv & CRSP databases), and 5) macroeconomic and environmental factors (FRED, CRSP, & Compustat databases).

#### ***First Category: Deal Attributes***

Value of Transaction  
Value of Transaction to Acquirer Assets  
Ranking Value of Transaction including Net Debt of Target  
Target Public Status  
Number of Bidders  
Percent of Share Held 6 Months Prior to Announcement  
Percent of Shares Sought  
Percent of Shares Sought in Tender Offer  
Initial Offer Price  
Percent of Cash/Stock/Other/Unknown Payment  
Premium Paid 1/4 weeks Prior to Announcement  
Value of Cash  
Value of Common Stock  
Analyst Estimated Value  
Implied Deal Value  
Intrastate Deal  
State Distance between Acquirer and Target Headquarters  
Same-industry Deal  
Month/Date Announced  
Form of Deal (Acquisition of Majority Interest, Acquisition of Remaining Interest, Acquisition of Certain Assets, Acquisition of Assets)  
Deal Attitude (Friendly, Hostile, Neutral, or Unsolicited)  
Offering Technique (Tender Offer)  
Definitive Agreement Review  
Fiduciary Termination Right  
FTC Review  
Acquirer-target Relative Size

#### ***Second Category: Characteristics and Accounting Performance of the Acquirer and Target***

Acquirer Assets; Sales; Property, Plant, and Equipment (PP&E); Inventory; Capital Expenditure; Special Items; Market Capitalization; Size (Market Capitalization/Asset/Sales-based); Market-to-book Ratio; Tobin's Q; Gross Margin; Operating Margin; Net Profit Margin; Dividend Payout Ratio; Current Ratio;

Quick Ratio; Debt; Debt-to-equity Ratio; PP&E Newness; PP&E over Sales/Assets; Inventory over Sales/Assets; Capital Expenditure over Sales/Assets; R&D Expenditure over Sales/Assets; Advertising Expenses over Sales/Assets; Special Items over Sales/Assets; Sales Growth; Return-on-assets; Return-on-sales; Return-on-equity; Return-on-investment; EPS  
Acquirer R&D Expenditure over Sales/Assets 3-year Moving Average  
Acquirer Capital Expenditure over Sales/Assets 3-year Moving Average  
Acquirer/Target EBIT  
Acquirer/Target Net Income  
Acquirer/Target Equal Weighted Industry Return  
Acquirer/Target Value Weighted Industry Return  
Acquirer/Target Industry Average Dividend Payout Ratio  
Acquirer/Target Industry Average Dividend Yield  
Acquirer/Target Industry Average Book-to-market Ratio  
Acquirer/Target Industry Average Price-to-sales Ratio  
Acquirer/Target Industry Average Price-to-book Ratio  
Acquirer/Target Industry Average Gross Profit Margin  
Acquirer/Target Industry Average Return-to-assets  
Acquirer/Target Industry Average Return-to-equity  
Acquirer/Target Industry Average Capitalization Ratio  
Acquirer/Target Industry Average Cash Flow Margin  
Acquirer/Target Industry Average Debt-to-equity Ratio  
Acquirer/Target Industry Average Cash Ratio  
Acquirer/Target Industry Average Current Ratio  
Acquirer/Target Industry Average Asset Turnover  
Acquirer/Target Industry Average Inventory Turnover  
Acquirer/Target Industry Average Sales-to-Working Capital Ratio  
Acquirer/Target Industry Average R&D over Assets  
Acquirer/Target Industry Average Advertising Expenses over Sales  
Acquirer/Target Industry Average Labor Expenses over Sales  
Target Forecasted EBIT

***Third Category: Prior Acquisition Activities and Performance of the Acquirer***

Count of Prior Acquisitions  
Count of Prior Acquisitions with Positive Stock Returns  
Percentage of Prior Acquisitions with Positive Stock Returns  
Average Stock Returns to Prior Acquisitions  
Standard Deviation/Minimum/ Maximum of Stock Returns to Prior Acquisitions  
Standard Deviation of Stock Returns to 3/5 Most Recent Acquisitions  
Minimum Stock Returns to 3/5 Most Recent Acquisitions  
Maximum Stock Returns to 3/5 Most Recent Acquisitions  
Count of Prior Withdrawn Deals  
Count of Prior Withdrawn Deals with Positive Stock Returns

***Fourth Category: Activeness and Performance of Recent Acquisitions in the Market***

Count of Acquisitions over Past 1/3/6/12 Month(s)  
Count of Acquisitions over Past 1/3/6/12 Month(s) with Positive Stock Returns  
Percentage of Acquisitions over Past 1/3/6/12 Month(s) with Positive Stock Returns  
Average Stock Returns to Acquisitions over Past 1/3/6/12 Month(s)  
Standard Deviation of Stock Returns to Acquisitions over Past 1/3/6/12 Month(s)  
Minimum Stock Returns to Acquisitions over Past 1/3/6/12 Month(s)  
Maximum Stock Returns to Acquisitions over Past 1/3/6/12 Month(s)

Average Stock Returns to 5/10/20 Most Recent Acquisitions in the Market  
Standard Deviation of Stock Returns to 5/10/20 Most Recent Acquisitions in the Market  
Minimum Stock Returns to 5/10/20 Most Recent Acquisitions in the Market  
Maximum Stock Returns to 5/10/20 Most Recent Acquisitions in the Market

***Fifth Category: Macroeconomic and Environmental Factors***

Industrial Production Index  
Inflation Level  
Oil Prices  
Term Spread  
Default Spread  
Political Uncertainty Index  
S&P 500 Daily/Monthly Return  
FTC Transactions Reviewed  
FTC Second Request Issued  
FTC Second Request Ratio  
FTC Early Termination Transactions Granted  
FTC Early Termination Transactions Not Granted  
Industry Total Number of Firms  
Industry Total/Average Sales  
Industry Total/Average Sales Yearly Change  
Industry Total/Average Sales Standard Deviation over Past Five Years  
Unpredictability of Industry Total/Average Sales (Standard Error of Year Dummy in Predicting Sales)  
based on 1/2/3-digit SIC Code  
Unpredictability of Industry Total/Average Sales (R-squared in Predicting Sales) based on 1/2/3-digit SIC  
Code  
Acquirer Industry Number of Firms  
Acquirer Industry Total/Average Sales based on 2/3-digit SIC Code  
Acquirer Industry Total/Average Sales Yearly Change based on 2/3-digit SIC Code  
Acquirer Industry Total/Average Sales Standard Deviation over Past Five Years based on 2/3-digit SIC  
Code

## **Appendix B.** Visualization of a Decision Tree in the Random Forest model

Below, we provide visualizations of a randomly selected decision tree generated by the Random Forest Model. Since decision trees can be dramatically different and vary (Choudhury et al. 2021), we provide the visualization primarily for illustrative purposes. In the decision tree, the factor, Target Public Status, shows up at the top of the tree, indicating that it is a very informative feature in predicting market reactions. Additionally, Relative Deal Size and Percentage of Stock Payment are also at the top in the decision tree. These results are consistent with the impurity-based and permutation-based feature importance that we report in Table 2. Other factors include characteristics of the acquirer (e.g., size, profitability), prior acquisition performance of the acquirer, and performance of recent acquisitions in the market prior to the focal transaction. In unreported analyses, we also develop Accumulated Local Effects (ALE) plots of the relationship between several variables and market reactions based on the Random Forest model to visualize patterns in the data. Overall, the interpretation of the ML models through various techniques accords well with prior research, and reaffirms that market reactions are associated with fundamentals related to an acquisition transaction.

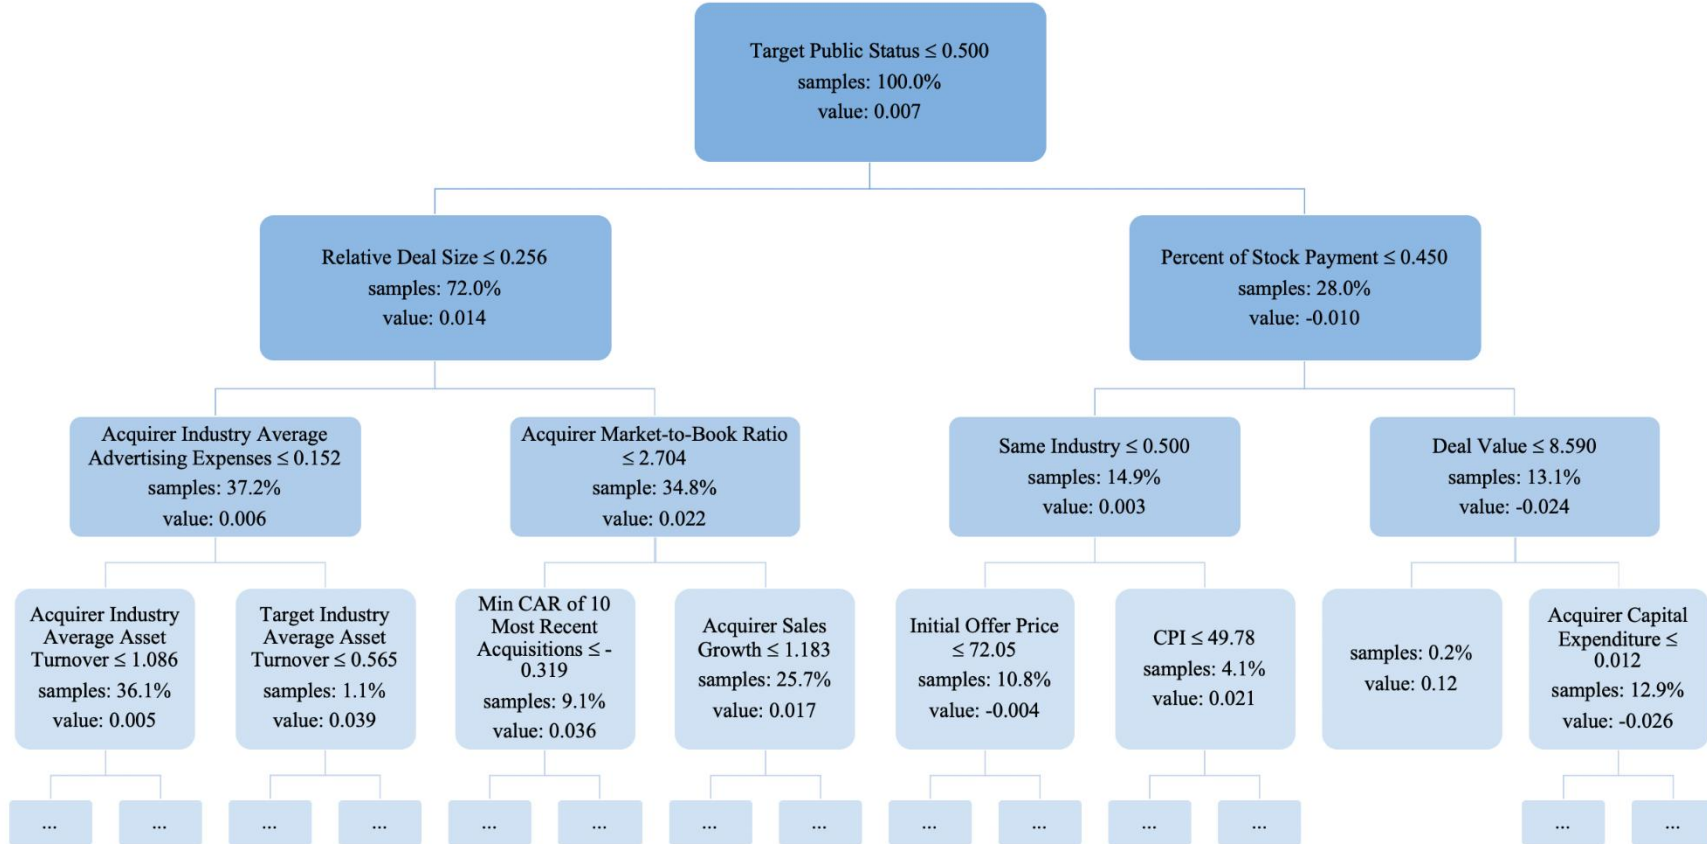

*Note:* Only the top four layers of the decision tree are presented in the interest of space. Left-pointing arrows represent “True”, while right-pointing arrows represent “False”.

**Appendix C. OLS Regression Analysis of CAR-Predicted CAR Disparity**

| Variables                       | Model 1              |
|---------------------------------|----------------------|
| Public Target                   | 0.010**<br>(0.004)   |
| Percentage of Stock Payment     | 0.005<br>(0.006)     |
| Deal Value to Acquirer Assets   | 0.013***<br>(0.003)  |
| Same Industry                   | -0.004<br>(0.004)    |
| Geographical Distance           | -0.001+<br>(0.000)   |
| Pre-Announcement Days           | 0.003*<br>(0.002)    |
| Acquirer Size                   | 0.001<br>(0.003)     |
| Acquirer ROA                    | -0.001<br>(0.016)    |
| Acquirer Tobin's Q              | 0.001<br>(0.002)     |
| Acquirer Leverage Ratio         | -0.005**<br>(0.002)  |
| Acquirer Acquisition Experience | 0.002<br>(0.004)     |
| Acquirer Historical Average CAR | -0.186***<br>(0.049) |
| M&A Wave                        | -0.002<br>(0.006)    |
| Constant                        | 0.135*<br>(0.052)    |
| Adjusted R-squared              | 0.376                |

*Note:* Dependent variable is *CAR-Predicted CAR Disparity*. N=2,647. Models are estimated with firm, industry, and year fixed effects. \*\*\* p < 0.001; \*\* p < 0.01; \* p < 0.05; + p < 0.10. Standard errors are reported in parentheses.

#### Appendix D. Control Variables in Regression Analyses

| <b>Variable</b>                          | <b>Description</b>                                                                                                                                                                                   |
|------------------------------------------|------------------------------------------------------------------------------------------------------------------------------------------------------------------------------------------------------|
| Public Target (dummy)                    | Public status of the target, = 1 if the target is a public company and 0 if the target is a private company                                                                                          |
| Percentage of Stock Payment              | Percentage of stock payment in the transaction                                                                                                                                                       |
| Deal Value to Acquirer Assets            | Deal value over acquirer's assets                                                                                                                                                                    |
| Same Industry (dummy)                    | Same industry indicator, =1 if the acquirer and the target are in the same industry based on their 4-digit SIC code, and 0 otherwise                                                                 |
| Geographical Distance (mile, logged)     | Geographical distance between the headquarters of the acquirer and the target, = log (Distance in miles)                                                                                             |
| FTC Enforcement (dummy)                  | Indicator of merger enforcement actions brought by FTC, =1 if the transaction is reviewed by the FTC and 0 otherwise                                                                                 |
| FTC Transactions Reviewed (logged)       | Total number of transactions reviewed by the FTC under the Hart-Scott-Rodino Antitrust Improvements Act in the past 90 days prior to the announcement of the focal transaction, = log (Transactions) |
| Pre-Announcement Days (logged)           | Number of days between the date when the target publicly announces its search of buyer and the announcement date of the transaction by the intended acquirer, = log(1+Days)                          |
| Acquirer ROA                             | Acquirer's return on assets                                                                                                                                                                          |
| Acquirer Tobin's Q                       | Acquirer's market value over assets                                                                                                                                                                  |
| Acquirer Leverage Ratio                  | Acquirer's debt-to-equity ratio                                                                                                                                                                      |
| Acquirer Acquisition Experience (logged) | Number of acquisitions conducted by the acquirer prior to the announcement of the focal transaction, = log(1+Acquisitions)                                                                           |
| Acquirer Historical Average CAR          | Historical average market reactions to acquisition announcements prior to the announcement of the focal transaction                                                                                  |
| M&A Wave (logged)                        | Total number of transactions conducted by all other firms in the past 90 days prior to the announcement of the focal transaction, = log(1+Acquisitions)                                              |

**References**

Choudhury P, Allen RT, Endres MG (2021) Machine learning for pattern discovery in management research. *Strategic Management J.* 42(1):30–57.
